# Supplementary material
Source: PubMed Central journal article supplement (PMC6408963)
Supplement: NIHMS1511988-supplement-1.pdf [file NIHMS1511988-supplement-1.pdf]

**Table E1.** EoEHSS Pathologic Features

| <b>Abbreviation</b> | <b>Pathologic Feature</b>         | <b>Description</b>                                                                                        |
|---------------------|-----------------------------------|-----------------------------------------------------------------------------------------------------------|
| <b>EI</b>           | Eosinophil Inflammation           | Intraepithelial eosinophils quantified in the most densely inflamed hpf.                                  |
| <b>EA</b>           | Eosinophil Abscesses              | Solid mass of intraepithelial eosinophils.                                                                |
| <b>SL</b>           | Eosinophil Surface Layering       | Linear alignment of at least 3 intraepithelial eosinophils positioned parallel to the epithelial surface. |
| <b>BZH</b>          | Epithelial Basal Zone Hyperplasia | Basal zone comprising >15% of the total epithelial thickness.                                             |
| <b>DIS</b>          | Dilated Intercellular Spaces      | Circumferential paracellular spaces around squamous epithelial cells that exhibit intercellular bridges.  |
| <b>SEA</b>          | Surface Epithelial Alteration     | Altered tinctorial properties of the surface epithelial cells that manifest as darker red staining.       |
| <b>DEC</b>          | Dyskeratotic Epithelial Cells     | Individual cells with deeply eosinophilic cytoplasm and small, round hyperchromatic nuclei                |
| <b>LPF</b>          | Lamina Propria Fibrosis           | Thickened connective tissue fibers in the lamina propria.                                                 |

hpf; High-power field

219

220

221

**TABLE EII.** Subject Demographics‡

|                                                                             | <b>Inactive EoE<br/>(PEC &lt;15/hpf)</b> | <b>Active EoE<br/>(PEC ≥15/hpf)</b> | <b>Significance (P)</b> |
|-----------------------------------------------------------------------------|------------------------------------------|-------------------------------------|-------------------------|
| <b>Number (n)</b>                                                           | 14                                       | 17                                  | --                      |
| <b>Median Age* (y, Interquartile range)</b>                                 | 8.0 (3.3-13.1)                           | 14.3 (6-16.9)                       | 0.07 (n.s)              |
| <b>Sex (% Male)</b>                                                         | 50                                       | 65                                  | 0.48 (n.s.)             |
| <b>Atopy† (%)</b>                                                           | 79                                       | 82                                  | >0.99 (n.s.)            |
| <b>Median PEC (Eos/hpf [Interquartile range])</b>                           | 0.5 (0-3)                                | 52 (36-86)                          | <0.001                  |
| <b>Median Absolute Blood EoP Count (EoP/mL blood [Interquartile range])</b> | 13.5 (5.5-30.3)                          | 37 (20.5-49.0)                      | <0.001                  |

‡ Previously published data<sup>6</sup>

\* Age at time of endoscopy

† Per medical records; patients were considered atopic if they had at least one atopic disorder (eczema, allergic rhinitis, asthma)

PEC, Peak esophageal eosinophil count; EoE, Eosinophilic esophagitis; Eos, Eosinophil; hpf, High-power field;

EoP, Eosinophil progenitor; n.s., Not significant
